# Supplementary material for: Perdecanoic acid as a safe and stable medium-chain peracid for Baeyer–Villiger oxidation of cyclic ketones to lactones
Source: Royal Society of Chemistry journal article supplement (doi:10.1039/c9ra06087a), 2019-01-01
Supplement: c9ra06087a1.pdf [file c9ra06087a1.pdf]

## Electronic Supplementary Information

### Perdecanoic acid as a safe and stable medium-chain peracid for Baeyer-Villiger oxidation of cyclic ketones to lactones

Magdalena Sitko,<sup>1</sup> Anna Szelwicka,<sup>1</sup> Andrzej Wojewódka,<sup>2</sup> Andrzej Skwarek,<sup>3</sup> Dariusz Tadasiewicz,<sup>3</sup> Lech Schimmelpfennig,<sup>3</sup> Krzysztof Dziuba,<sup>3</sup> Magdalena Morawiec-Witczak<sup>3</sup> and Anna Chrobok<sup>1\*</sup>

<sup>1</sup> Department of Chemical Organic Technology and Petrochemistry, Silesian University of Technology, Krzywoustego 4, 44-100 Gliwice, Poland; Anna.Chrobok@polsl.pl

<sup>2</sup> Department of Inorganic Chemistry, Analytical Chemistry and Electrochemistry, Silesian University of Technology, Krzywoustego 6, 44-100 Gliwice, Poland

<sup>3</sup> Grupa Azoty Zakłady Azotowe Puławy S.A., Tysiąclecia Państwa Polskiego 13, 24-110 Puławy, Poland

#### 1. Elemental analysis of peracids.

**Table S1.** Elemental analysis of peracids.

| Peracid            | Theoretical content of atoms, % |       |      | Determined content of atoms, <sup>a</sup> % |       |      |
|--------------------|---------------------------------|-------|------|---------------------------------------------|-------|------|
|                    | C                               | H     | N    | C                                           | H     | N    |
| perC <sub>8</sub>  | 60.00                           | 10.00 | 0.00 | 60.10                                       | 10.85 | 0.08 |
| perC <sub>10</sub> | 63.80                           | 10.63 | 0.00 | 63.28                                       | 11.29 | 0.03 |
| perC <sub>12</sub> | 66.67                           | 11.11 | 0.00 | 66.73                                       | 11.85 | 0.09 |

<sup>a</sup> average content based on three independent experiments

## 2. $^1\text{H}$ and $^{13}\text{C}$ NMR spectra of peracids.

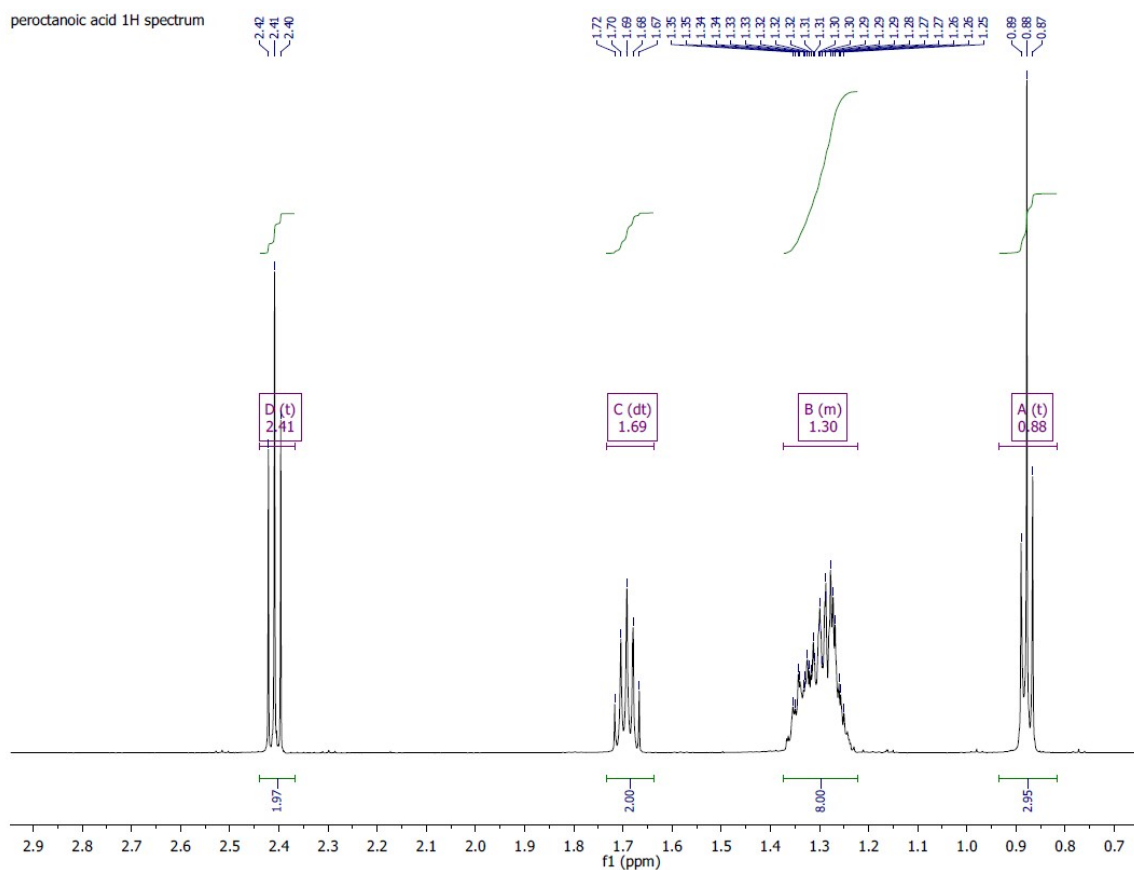

Figure S1.  $^1\text{H}$  NMR spectrum of peroctanoic acid.

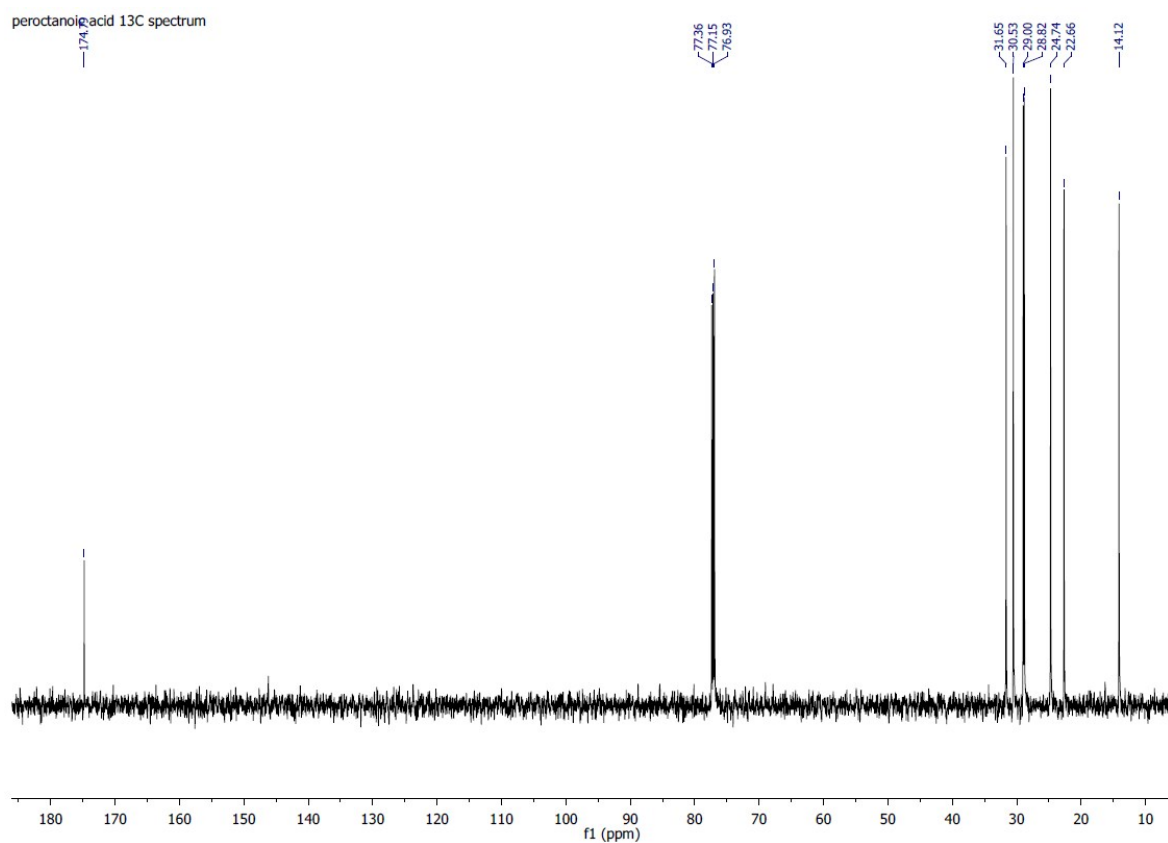

Figure S2.  $^{13}\text{C}$  NMR spectrum of peroctanoic acid.

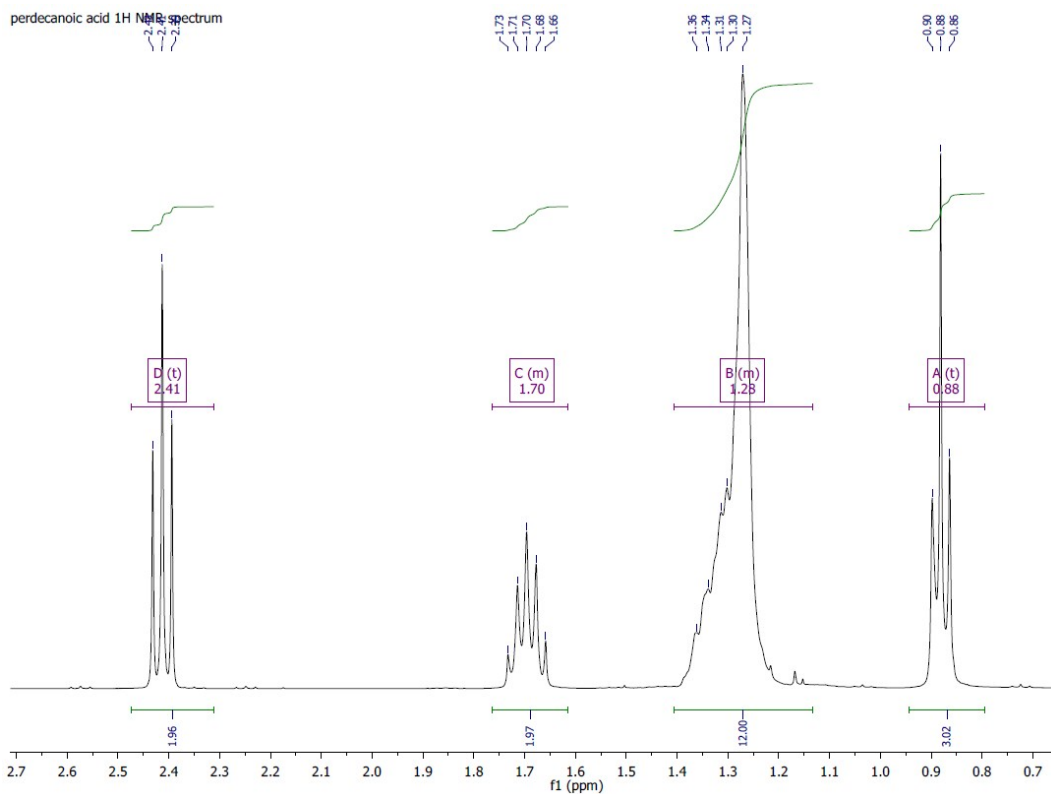

Figure S3. <sup>1</sup>H NMR spectrum of perdecanoic acid.

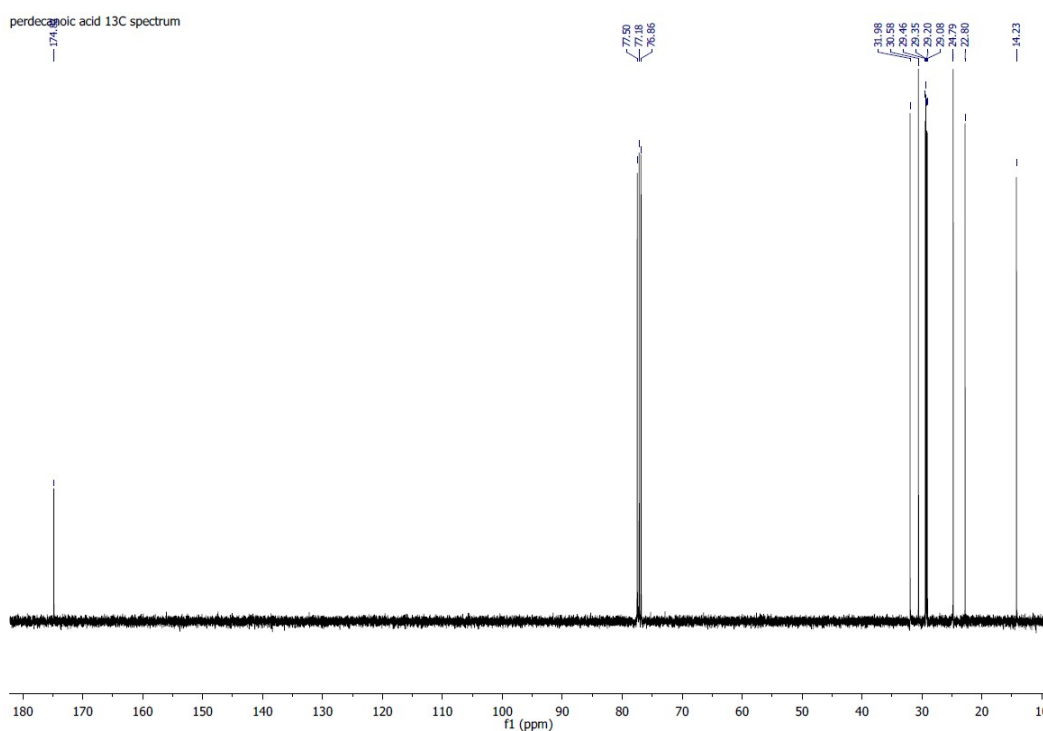

Figure S4. <sup>13</sup>C NMR spectrum of perdecanoic acid.

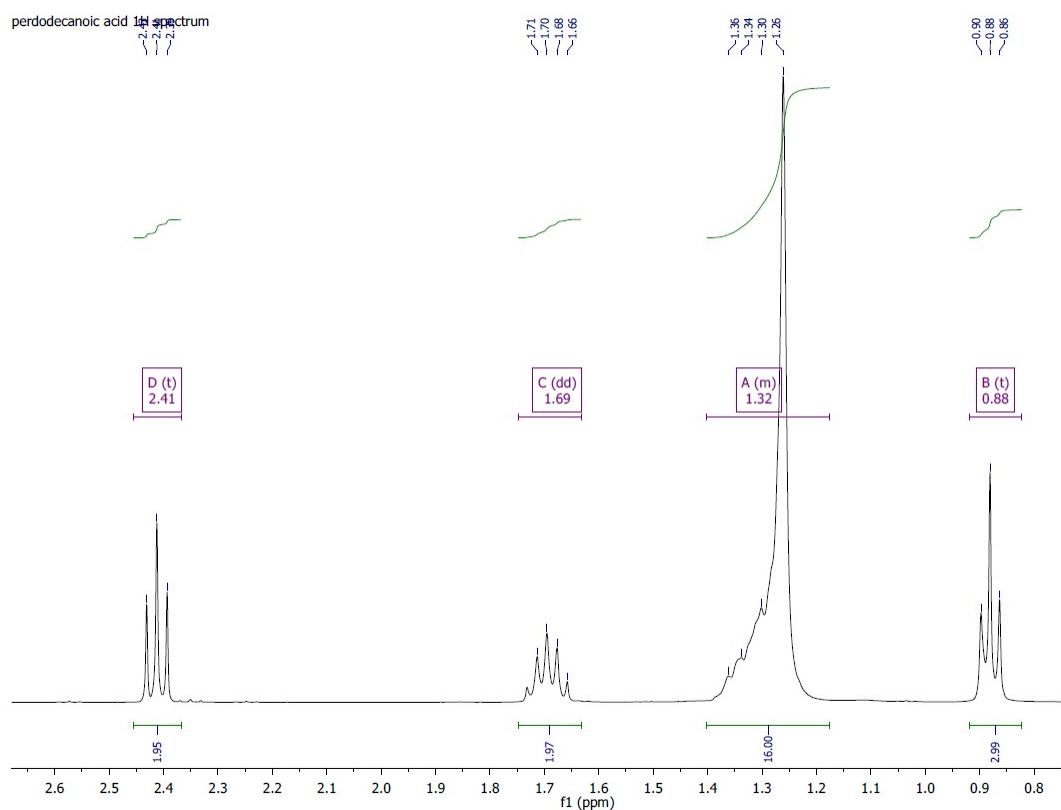

Figure S5. <sup>1</sup>H NMR spectrum of perdodecanoic acid.

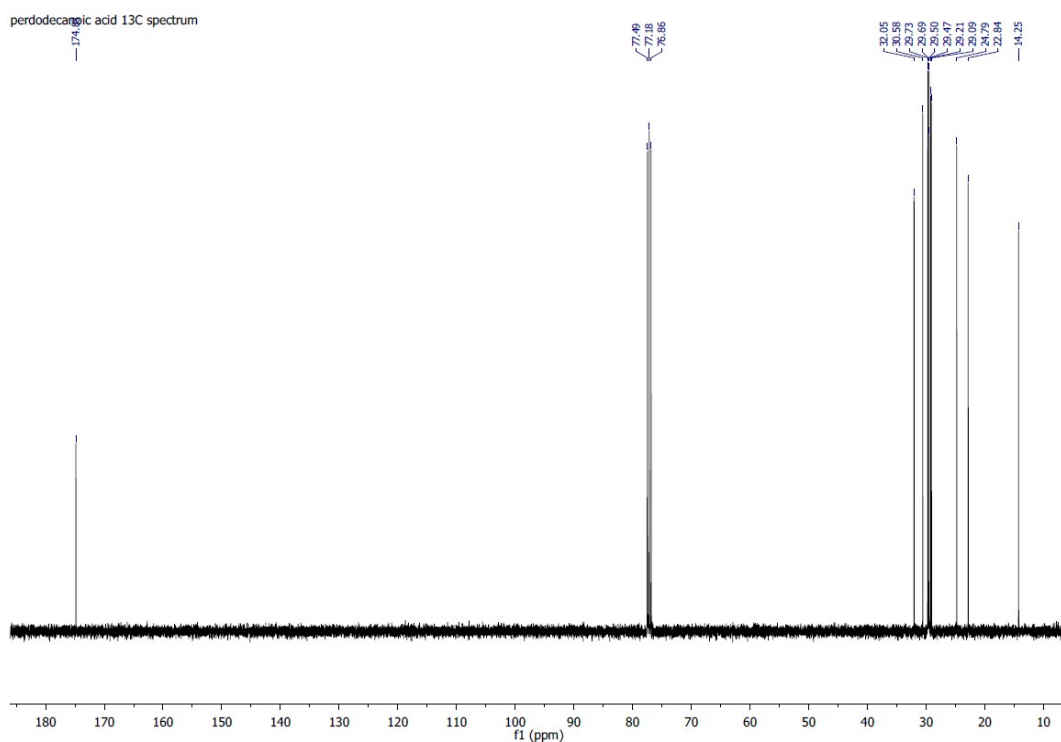

Figure S6. <sup>13</sup>C NMR spectrum of perdodecanoic acid.

### 3. Sensitivity of peracids to friction.

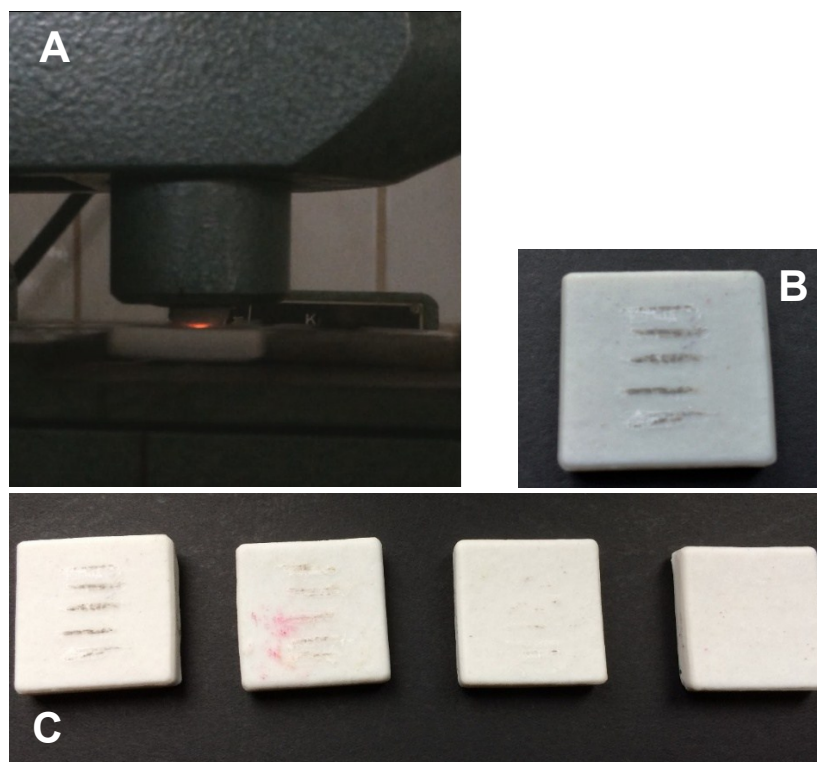

**Figure S7.** A: Positive effect of experiment – red flash; B: Positive effect of experiment – visible mark of decomposition on the plate; C: Comparison of plates showing the course of the experiments – from positive effect to negative effect/no effect (from left to right).

**Table S2.** Results for sensitivity to friction for perhexanoic acid; (+) positive effect of experiment, (-) negative effect of experiment.

| Force<br>/ N | No. of experiment |   |   |   |   |   | Observed effect                            |
|--------------|-------------------|---|---|---|---|---|--------------------------------------------|
|              | 1                 | 2 | 3 | 4 | 5 | 6 |                                            |
| 353          | +                 |   |   |   |   |   | red flash                                  |
| 157          | +                 |   |   |   |   |   | visible mark of decomposition on the plate |
| 118          | +                 |   |   |   |   |   | visible mark of decomposition on the plate |
| 110          | +                 | + |   |   |   |   | visible mark of decomposition on the plate |
| 106          | +                 |   |   |   |   |   | visible mark of decomposition on the plate |
| 96           | +                 |   |   |   |   |   | visible mark of decomposition on the plate |
| 82           | +                 | + |   |   |   |   | visible mark of decomposition on the plate |
| 78           | -                 | + |   |   |   |   | visible mark of decomposition on the plate |
| 71           | +                 | + |   |   |   |   | visible mark of decomposition on the plate |
| 63           | -                 | + |   |   |   |   | visible mark of decomposition on the plate |
| 59           | +                 |   |   |   |   |   | visible mark of decomposition on the plate |
| 55           | +                 | - | + |   |   |   | visible mark of decomposition on the plate |
| 53           | +                 | + |   |   |   |   | visible mark of decomposition on the plate |
| 47           | -                 | - | + |   |   |   | visible mark of decomposition on the plate |

| Force<br>/ N | No. of experiment |   |   |   |   |   | Observed effect   |
|--------------|-------------------|---|---|---|---|---|-------------------|
|              | 1                 | 2 | 3 | 4 | 5 | 6 |                   |
| 41           | -                 | - | - | - | - | - | no visible effect |

**Table S3.** Results for sensitivity to friction for peroctanoic acid; (+) positive effect of experiment, (-) negative effect of experiment.

| Force<br>/ N | No. of experiment |   |   |   |   |   | Observed effect                                   |
|--------------|-------------------|---|---|---|---|---|---------------------------------------------------|
|              | 1                 | 2 | 3 | 4 | 5 | 6 |                                                   |
| 360          | +                 |   |   |   |   |   | red flash                                         |
| 324          | +                 |   |   |   |   |   | visible mark of decomposition on the plate        |
| 252          | +                 |   |   |   |   |   | visible mark of decomposition on the plate        |
| 216          | +                 |   |   |   |   |   | visible mark of decomposition on the plate        |
| 240          | +                 |   |   |   |   |   | yellow flash                                      |
| 216          | +                 | + |   |   |   |   | visible mark of decomposition on the plate        |
| 192          | +                 |   |   |   |   |   | visible mark of decomposition on the plate        |
| 180          | +                 | - | + | + |   |   | weakly visible mark of decomposition on the plate |
| 168          | +                 | + | + |   |   |   | yellow flash                                      |
| 160          | +                 | + |   |   |   |   | visible mark of decomposition on the plate        |
| 144          | +                 |   |   |   |   |   | visible mark of decomposition on the plate        |
| 128          | +                 |   |   |   |   |   | visible mark of decomposition on the plate        |
| 112          | +                 |   |   |   |   |   | weakly visible mark of decomposition on the plate |
| 108          | +                 |   |   |   |   |   | weakly visible mark of decomposition on the plate |
| 96           | +                 |   |   |   |   |   | weakly visible mark of decomposition on the plate |
| 84           | +                 |   |   |   |   |   | weakly visible mark of decomposition on the plate |
| 80           | +                 |   |   |   |   |   | weakly visible mark of decomposition on the plate |
| 72           | +                 | + |   |   |   |   | weakly visible mark of decomposition on the plate |
| 64           | -                 | + |   |   |   |   | weakly visible mark of decomposition on the plate |

**Table S4.** Results for sensitivity to friction for perdecanoic acid; (+) positive effect of experiment, (-) negative effect of experiment.

| Force<br>/ N | No. of experiment |   |   |   |   |   | Observed effect                            |
|--------------|-------------------|---|---|---|---|---|--------------------------------------------|
|              | 1                 | 2 | 3 | 4 | 5 | 6 |                                            |
| 353          | +                 |   |   |   |   |   | visible mark of decomposition on the plate |
| 157          | +                 |   |   |   |   |   | visible mark of decomposition on the plate |
| 141          | +                 |   |   |   |   |   | visible mark of decomposition on the plate |
| 125          | -                 | - | - | - | + |   | visible mark of decomposition on the plate |
| 118          | -                 | + |   |   |   |   | visible mark of decomposition on the plate |
| 110          | +                 | - | + | - | + |   | visible mark of decomposition on the plate |
| 106          | -                 | - | - | - | - | - | no effect                                  |

**Table S5.** Results for sensitivity to friction for perdoecanoic acid; (+) positive effect of experiment, (-) negative effect of experiment.

| Force<br>/ N | No. of experiment |   |   |   |   |   | Observed effect                            |
|--------------|-------------------|---|---|---|---|---|--------------------------------------------|
|              | 1                 | 2 | 3 | 4 | 5 | 6 |                                            |
| 353          | +                 |   |   |   |   |   | visible mark of decomposition on the plate |
| 157          | +                 |   |   |   |   |   | visible mark of decomposition on the plate |
| 125          | +                 |   |   |   |   |   | visible mark of decomposition on the plate |
| 118          | +                 | - | - | - | + |   | visible mark of decomposition on the plate |
| 110          | -                 | - | - | - | - | - | no effect                                  |

#### 4. Sensitivity of peracids to shock.

**Table S6.** Results for sensitivity to shock for perhexanoic acid; (+) positive effect of experiment, (-) negative effect of experiment.

| Weight<br>/ kg | Height<br>/ cm | Energy<br>/ J | No. of experiment |   |   |   |   |   | Observed effect |
|----------------|----------------|---------------|-------------------|---|---|---|---|---|-----------------|
|                |                |               | 1                 | 2 | 3 | 4 | 5 | 6 |                 |
| 1              | 50             | 5             | -                 |   |   |   |   |   | no effect       |
| 5              | 60             | 30            | -                 |   |   |   |   |   | no effect       |
| 10             | 50             | 50            | -                 | - | - | - | - | - | no effect       |

**Table S7.** Results for sensitivity to shock for peroctanoic acid; (+) positive effect of experiment, (-) negative effect of experiment.

| Weight<br>/ kg | Height<br>/ cm | Energy<br>/ J | No. of experiment |   |   |   |   |   | Observed effect |
|----------------|----------------|---------------|-------------------|---|---|---|---|---|-----------------|
|                |                |               | 1                 | 2 | 3 | 4 | 5 | 6 |                 |
| 1              | 50             | 5             | -                 |   |   |   |   |   | no effect       |
| 5              | 60             | 30            | -                 |   |   |   |   |   | no effect       |
| 10             | 50             | 50            | -                 | - | - | - | - | - | no effect       |

**Table S8.** Results for sensitivity to shock for perdecanoic acid; (+) positive effect of experiment, (-) negative effect of experiment.

| Weight<br>/ kg | Height<br>/ cm | Energy<br>/ J | No. of experiment |   |   |   |   |   | Observed effect |
|----------------|----------------|---------------|-------------------|---|---|---|---|---|-----------------|
|                |                |               | 1                 | 2 | 3 | 4 | 5 | 6 |                 |
| 1              | 50             | 5             | -                 |   |   |   |   |   | no effect       |
| 5              | 60             | 30            | -                 |   |   |   |   |   | no effect       |
| 10             | 50             | 50            | -                 | - | - | - | - | - | no effect       |

**Table S9.** Results for sensitivity to shock for perdoecanoic acid; (+) positive effect of experiment, (-) negative effect of experiment.

| Weight<br>/ kg | Height<br>/ cm | Energy<br>/ J | No. of experiment |   |   |   |   |   | Observed effect |
|----------------|----------------|---------------|-------------------|---|---|---|---|---|-----------------|
|                |                |               | 1                 | 2 | 3 | 4 | 5 | 6 |                 |
| 1              | 50             | 5             | -                 |   |   |   |   |   | no effect       |
| 5              | 60             | 30            | -                 |   |   |   |   |   | no effect       |
| 10             | 50             | 50            | -                 | - | - | - | - | - | no effect       |

## 5. Sensitivity of peracids to electric spark.

**Table S10.** Results for sensitivity to the electric spark for peroctanoic acid; (+) positive effect of experiment, (-) negative effect of experiment.

| Energy<br>/ J | No. of experiment |   |   |   |   |   | Observed effect |
|---------------|-------------------|---|---|---|---|---|-----------------|
|               | 1                 | 2 | 3 | 4 | 5 | 6 |                 |
| 13.50         | -                 | + |   |   |   |   | smoke           |
| 11.76         | +                 |   |   |   |   |   | smoke           |
| 10.14         | +                 |   |   |   |   |   | smoke           |
| 6.00          | +                 |   |   |   |   |   | smoke           |
| 4.50          | +                 |   |   |   |   |   | smoke           |
| 4.21          | -                 | - | + |   |   |   | smoke           |
| 3.92          | +                 |   |   |   |   |   | smoke           |
| 3.65          | +                 |   |   |   |   |   | smoke           |
| 3.38          | +                 |   |   |   |   |   | smoke           |
| 2.88          | +                 |   |   |   |   |   | smoke           |
| 2.00          | +                 |   |   |   |   |   | smoke           |
| 1.96          | +                 |   |   |   |   |   | smoke           |
| 1.00          | +                 |   |   |   |   |   | smoke           |
| 0.54          | -                 | + |   |   |   |   | smoke           |
| 0.62          | +                 |   |   |   |   |   | smoke           |
| 0.56          | -                 | - | - | - | - | - | no effect       |
| 0.52          | -                 | - |   |   |   |   | no effect       |
| 0.49          | -                 |   |   |   |   |   | no effect       |
| 0.42          | -                 |   |   |   |   |   | no effect       |



**Table S11.** Results for sensitivity to the electric spark for perdecanoic acid; (+) positive effect of experiment, (-) negative effect of experiment.

| Energy<br>/J | No. of experiment |   |   |   |   |   | Observed effect                                                    |
|--------------|-------------------|---|---|---|---|---|--------------------------------------------------------------------|
|              | 1                 | 2 | 3 | 4 | 5 | 6 |                                                                    |
| 13.50        | -                 | - | - | - | - | - | no effect in 6 experiments; in experiment no. 7 smoke was observed |
| 12.615       | -                 | - | - | - | - | - | no effect                                                          |

**Table S12.** Results for sensitivity to the electric spark for perdocanoic acid; (+) positive effect of experiment, (-) negative effect of experiment.

| Energy<br>/J | No. of experiment |   |   |   |   |   | Observed effect |
|--------------|-------------------|---|---|---|---|---|-----------------|
|              | 1                 | 2 | 3 | 4 | 5 | 6 |                 |
| 13.50        | -                 | - | - | - | - | + | smoke           |
| 12.615       | -                 | + |   |   |   |   | smoke           |
| 11.76        | -                 | - | - | - | - | - | no effect       |

## 6. Thermal sensitivity of peracid.

**Table S13.** Results for thermal stability.

| Peracid         | Sample<br>/ mg | Rate of<br>heating<br>/ °C/min | Melting          |       |       |               | Decomposition    |        |        |               |
|-----------------|----------------|--------------------------------|------------------|-------|-------|---------------|------------------|--------|--------|---------------|
|                 |                |                                | Temperature / °C |       |       | Heat<br>/ J/g | Temperature / °C |        |        | Heat<br>/ J/g |
|                 |                |                                | Initial          | Max.  | End   |               | Initial          | Max.   | End    |               |
| C <sub>8</sub>  | 3.0000         | 2                              | 26.06            | 32.82 | 36.71 | 135.1         | 51.37            | 70.95  | 77.51  | 307.8         |
|                 | 2.7000         | 5                              | 22.39            | 33.38 | 40.88 | 205.6         | 69.69            | 92.16  | 100.00 | 313.6         |
|                 | 2.0000         | 10                             | 21.56            | 34.12 | 45.04 | 225.4         | 65.36            | 92.18  | 102.66 | 709.5         |
| C <sub>10</sub> | 2.9000         | 2                              | 36.55            | 44.09 | 53.20 | 256.6         | 71.19            | 87.16  | 116.65 | 770.6         |
|                 | 3.4000         | 5                              | 29.05            | 44.90 | 52.53 | 240.5         | 64.19            | 96.19  | 114.48 | 1036.0        |
|                 | 3.8000         | 10                             | 29.55            | 45.57 | 58.36 | 255.3         | 77.51            | 104.12 | 130.64 | 1077.0        |
| C <sub>12</sub> | 3.0500         | 2                              | 39.47            | 51.29 | 56.98 | 219.5         | 71.19            | 94.12  | 127.47 | 616.6         |
|                 | 3.0500         | 5                              | 39.88            | 51.75 | 58.53 | 239.6         | 68.69            | 108.99 | 147.96 | 734.1         |
|                 | 3.2000         | 10                             | 41.04            | 54.11 | 64.86 | 242.0         | 73.85            | 116.25 | 160.00 | 828.1         |
